# Supplementary figures and images for: Uncovering the Core Microbiome and Distribution of Palmerolide in Synoicum adareanum Across the Anvers Island Archipelago, Antarctica
Source: MDPI journal article supplement (doi:10.3390/md18060298), 2020-06-02

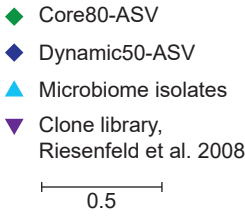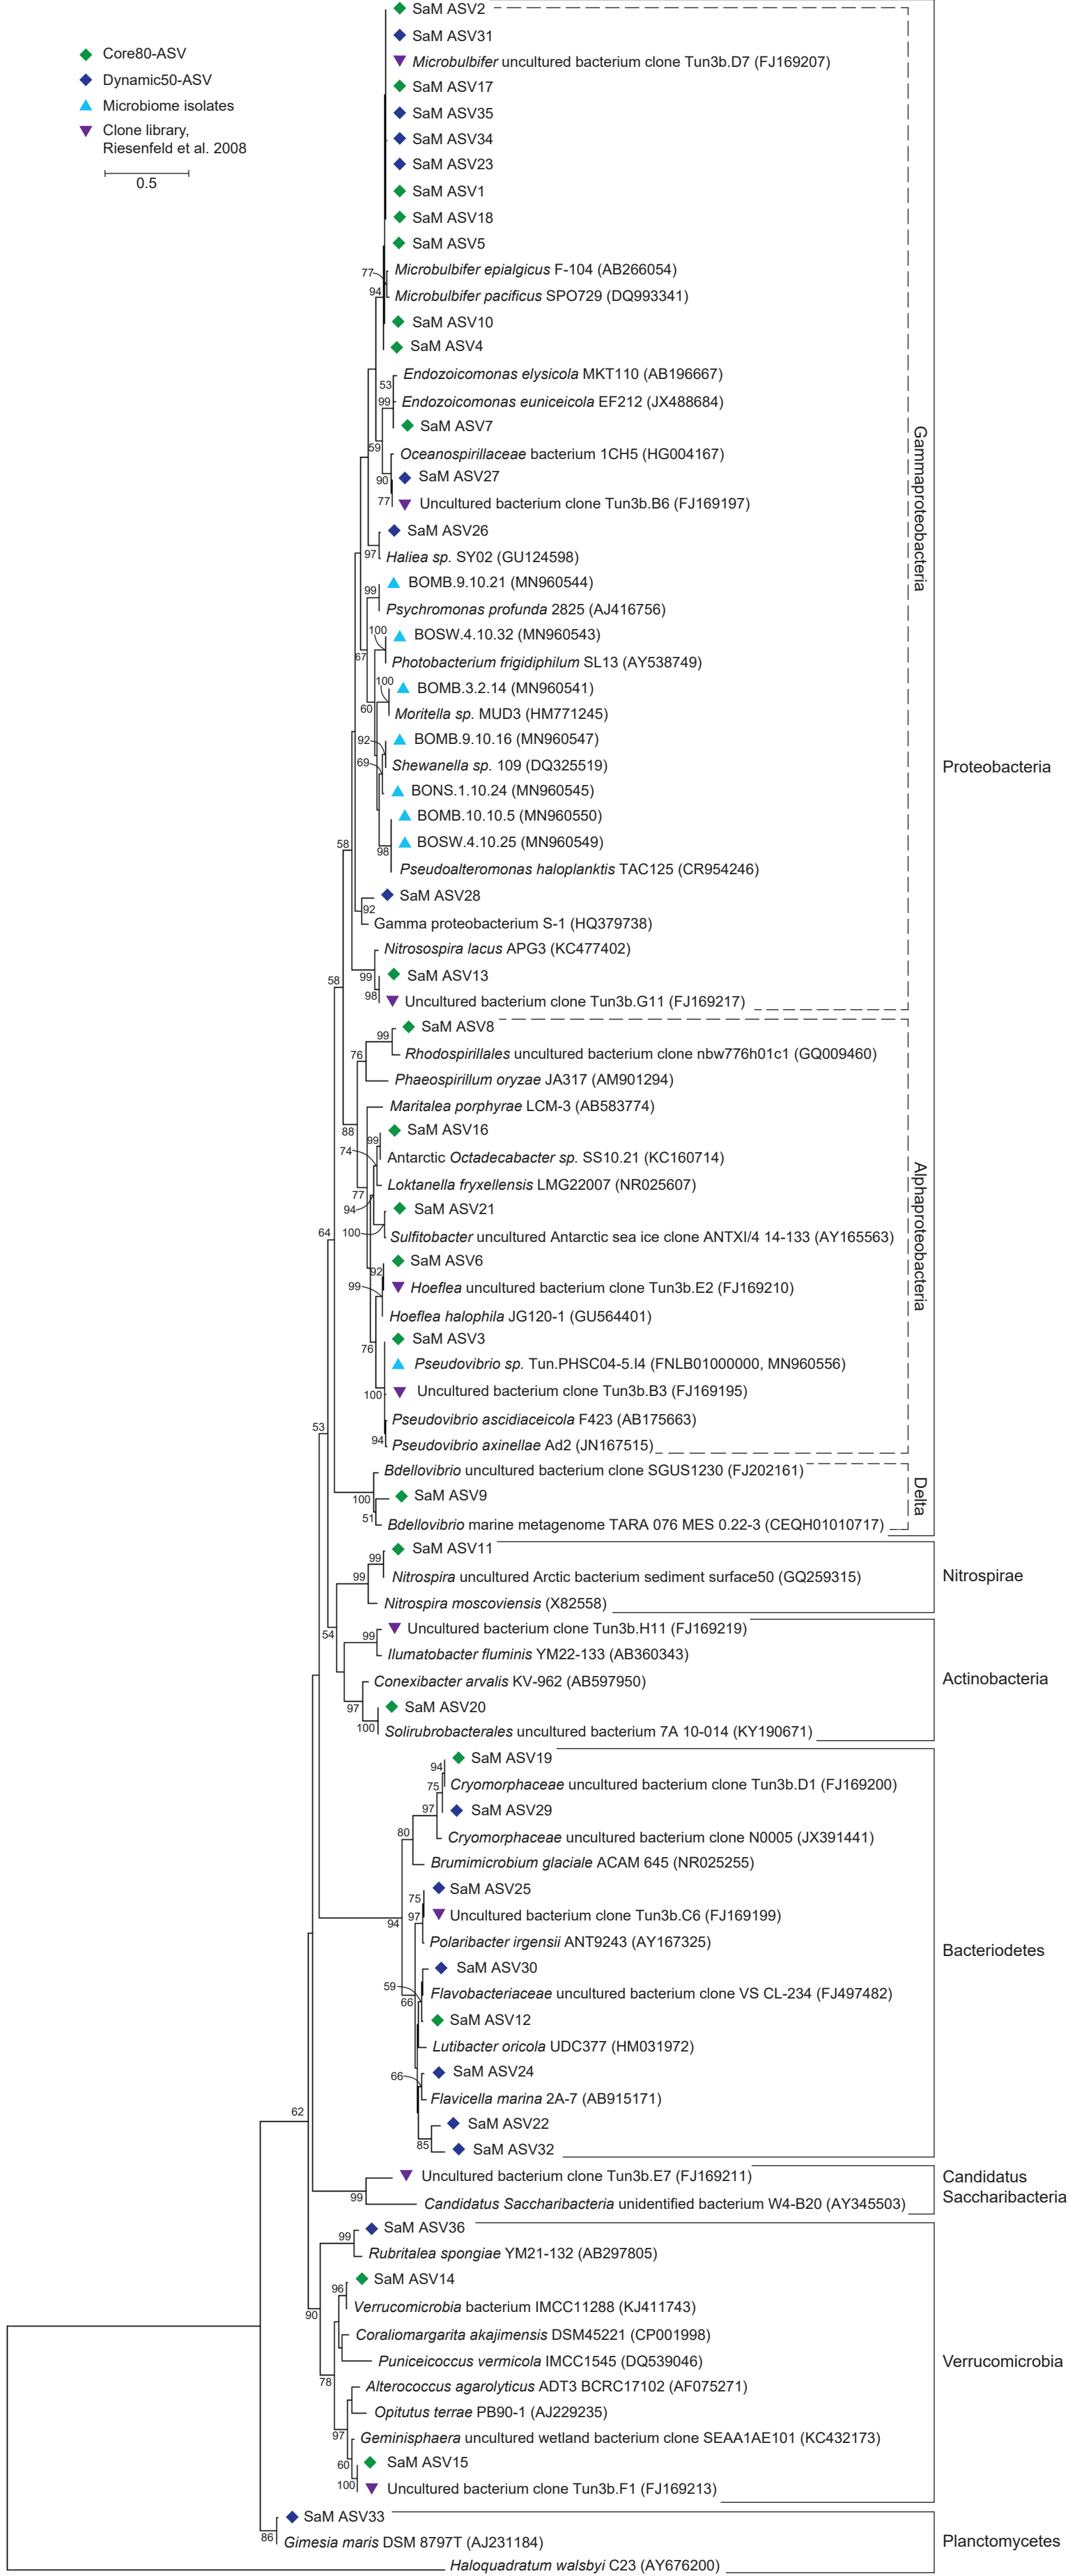

Supplement: s1 [file s1]
